# Supplementary material for: Electrolyte concentration modulates the surface structure evolution of Au(111) cathodes
Source: Royal Society of Chemistry journal article supplement (doi:10.1039/d5sc07564e), 2026-01-01
Supplement: d5sc07564e1.pdf [file d5sc07564e1.pdf]

## supplementary information

# Electrolyte Concentration Modulates the Surface Structure Evolution of Au(111) Cathodes

Yue Feng,<sup>‡ab</sup> Yu-Qi Wang,<sup>‡\*a</sup> Jiaju Fu,<sup>a</sup> Zi-Cong Wang,<sup>ab</sup> Dong Wang,<sup>\*ab</sup> and Li-Jun Wan<sup>\*ab</sup>

<sup>a</sup> CAS Key Laboratory of Molecular Nanostructure and Nanotechnology, CAS Research/Education Center for Excellence in Molecular Sciences, Beijing National Laboratory for Molecular Science, Institute of Chemistry, Chinese Academy of Sciences, Beijing 100190, China

<sup>b</sup> University of Chinese Academy of Sciences, Beijing 100049, China

<sup>‡</sup> These authors contributed equally.

\* Corresponding author. E-mail: wyqchem@iccas.ac.cn (Y. Q. W.); wangd@iccas.ac.cn (D. W.); wanlijun@iccas.ac.cn (L. J. W.)

## Results and discussion

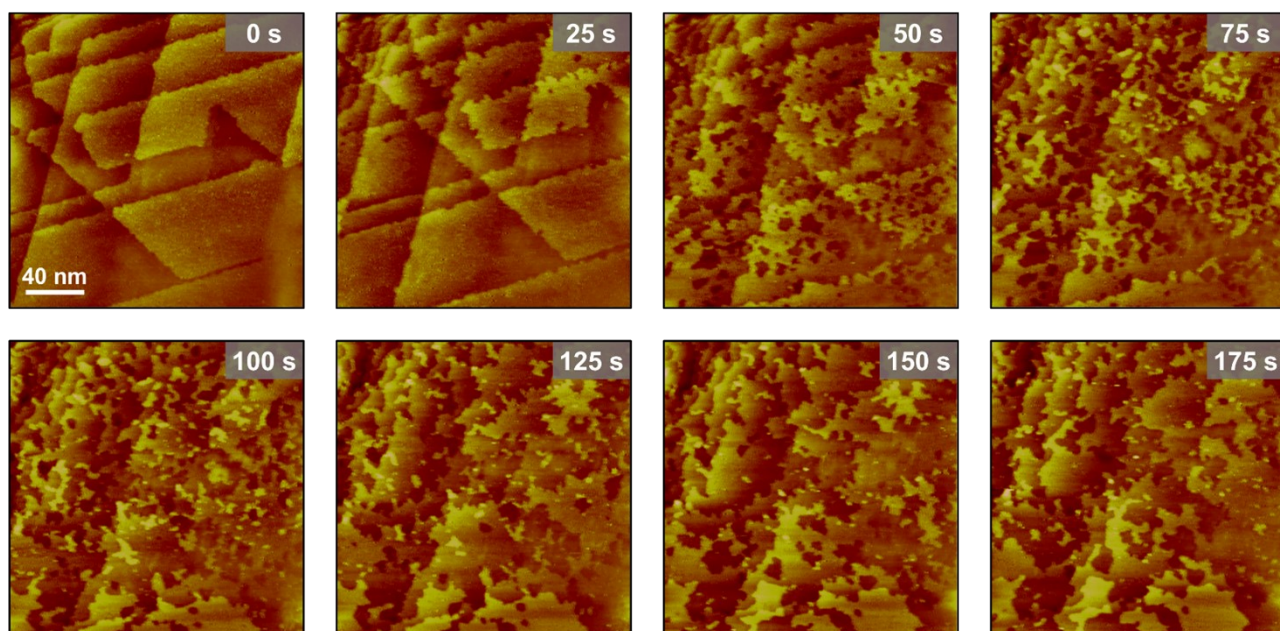

**Fig. S1.** EC-STM images of Au(111) in CO<sub>2</sub>-saturated 1 M CsHCO<sub>3</sub> electrolyte after the potential step from 0 V to -0.1 V.

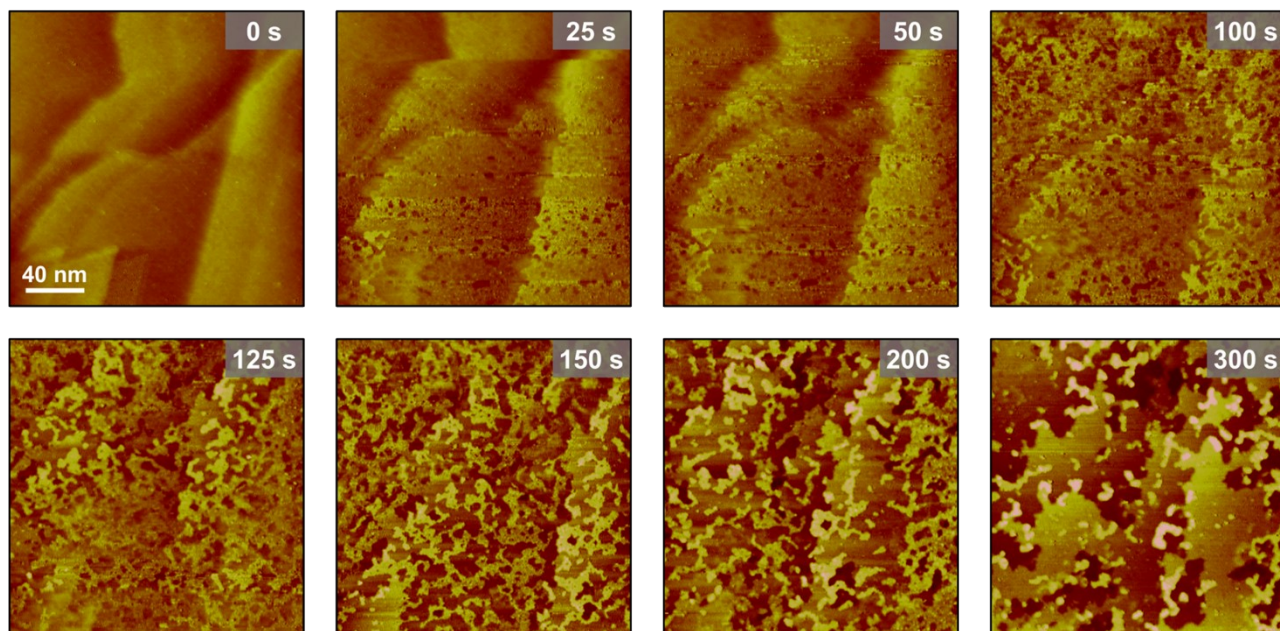

**Fig. S2.** EC-STM images of Au(111) in CO<sub>2</sub>-saturated 1 M RbHCO<sub>3</sub> electrolyte after the potential step from 0 V to -0.1 V.

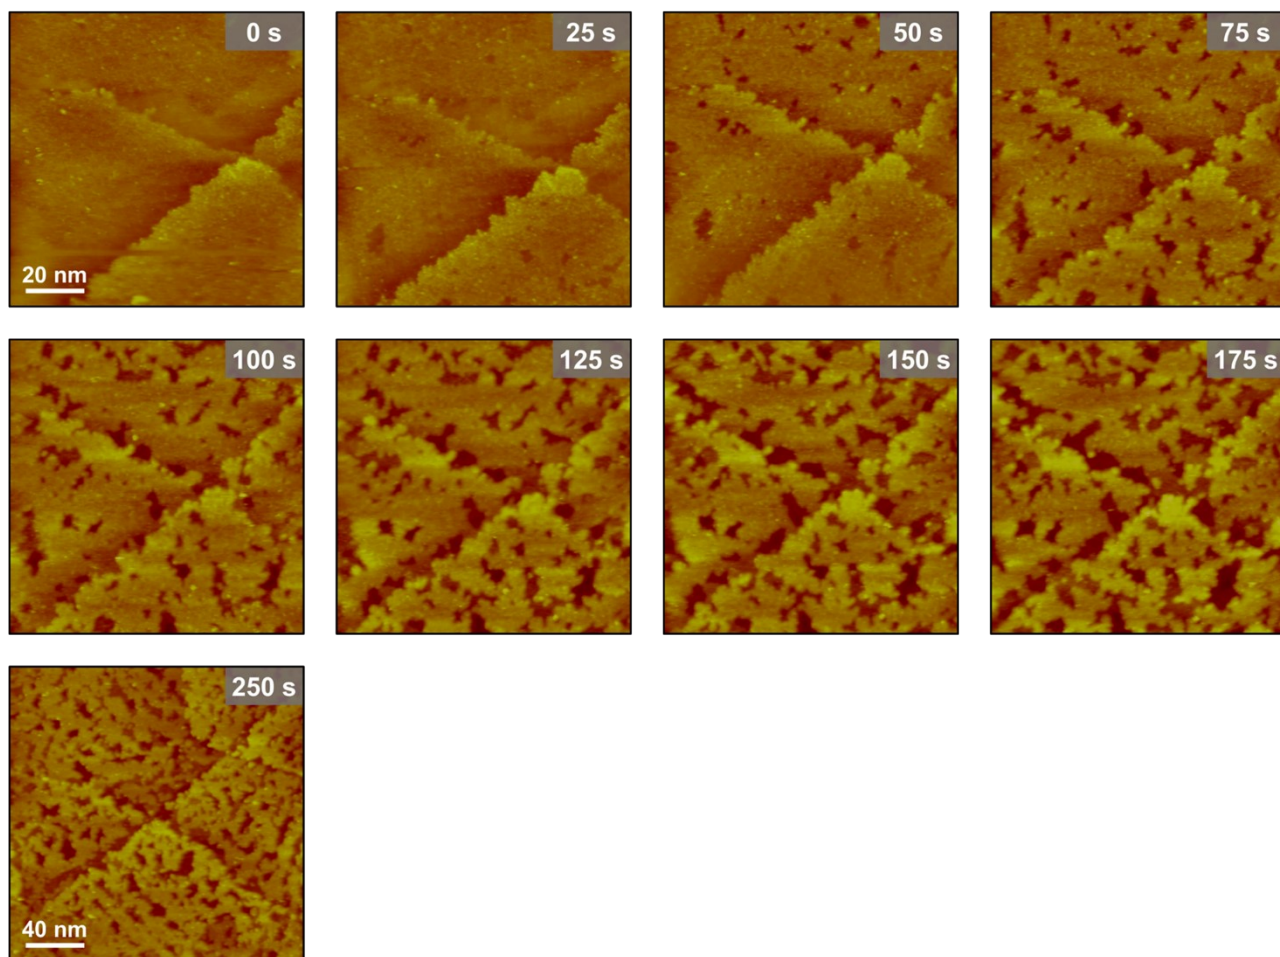

**Fig. S3.** EC-STM images of Au(111) in CO<sub>2</sub>-saturated 1 M KHCO<sub>3</sub> electrolyte after the potential step from 0 V to -0.1 V.



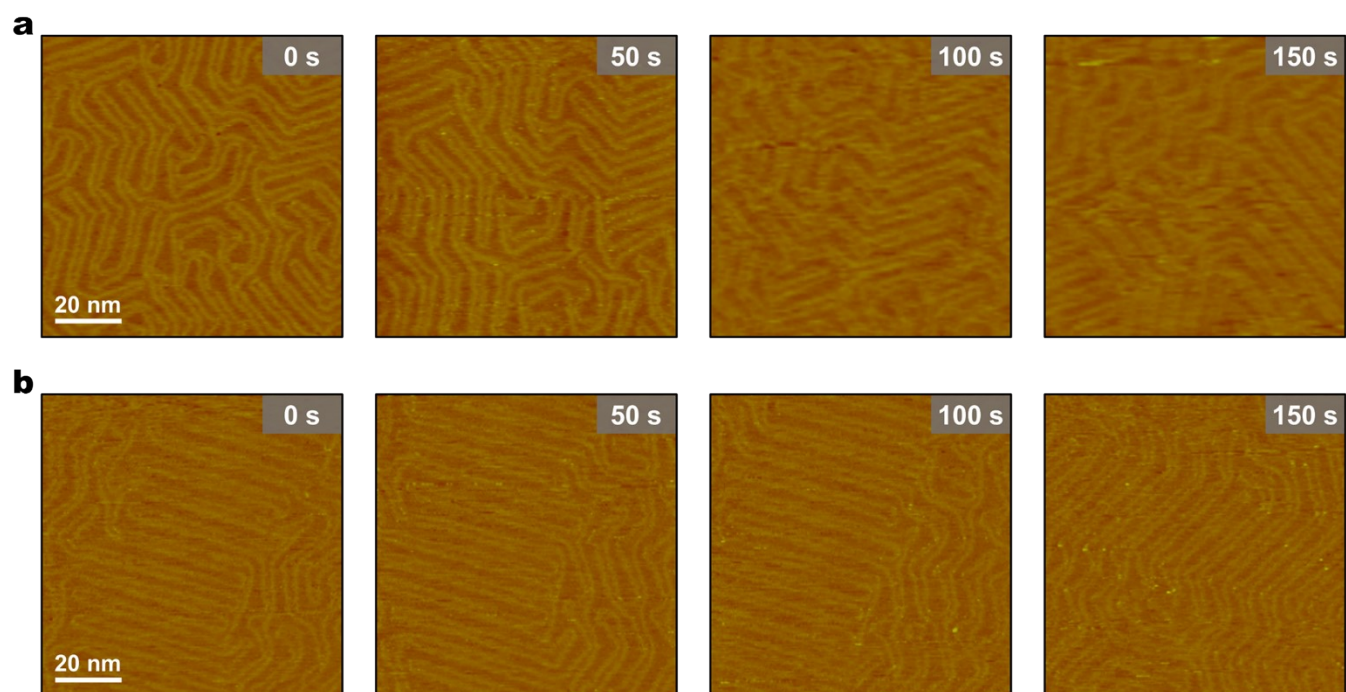

**Fig. S4.** EC-STM images of Au(111) in CO<sub>2</sub>-saturated 1 M (a) NaHCO<sub>3</sub> and (b) LiHCO<sub>3</sub> electrolytes after the potential step from 0 V to -0.1 V.

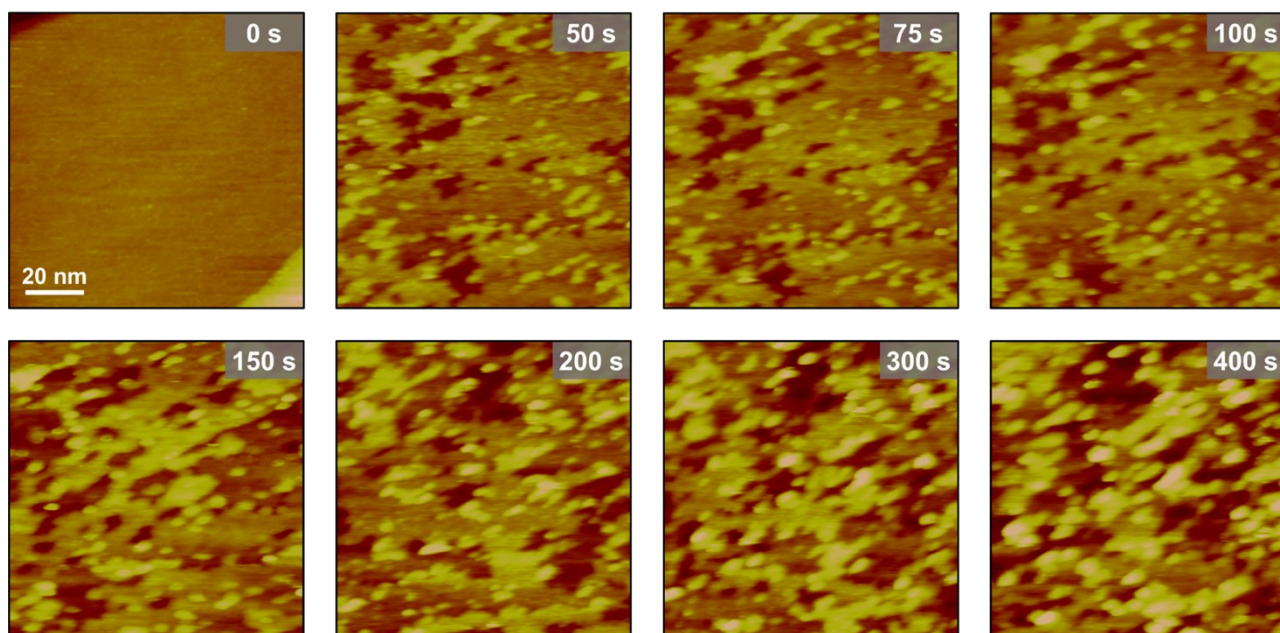

**Fig. S5.** EC-STM images of Au(111) in CO<sub>2</sub>-saturated 0.5 M CsHCO<sub>3</sub> electrolyte after the potential step from -0.1 V to -0.2 V.

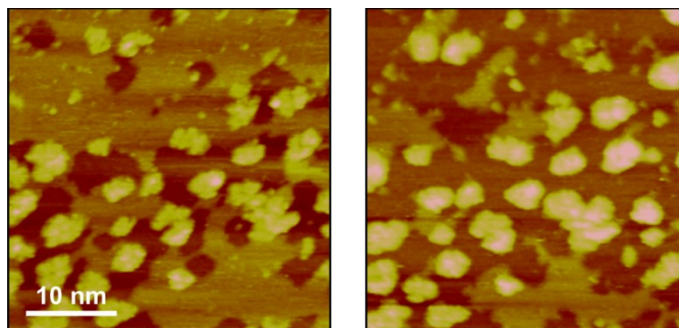

**Fig. S6.** In situ EC-STM images of Au(111) in CO<sub>2</sub>-saturated 0.5 M CsHCO<sub>3</sub> electrolyte at -0.2 V showing the release and clustering of surface Au atoms.

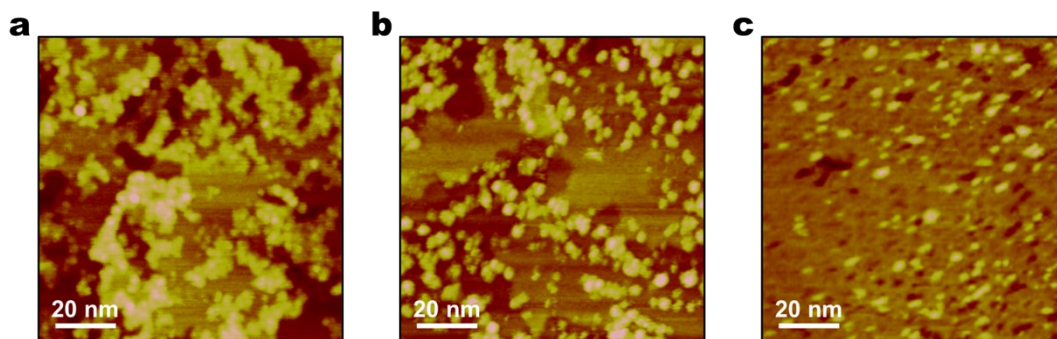

**Fig. S7.** EC-STM images of Au(111) in CO<sub>2</sub>-saturated 0.5 M (a) CsHCO<sub>3</sub>, (a) RbHCO<sub>3</sub>, and (a) KHCO<sub>3</sub> electrolytes after the potential step from -0.1 V to -0.2 V for 200 s.



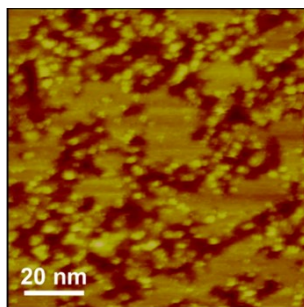

**Fig. S8.** EC-STM image of Au(111) in CO<sub>2</sub>-saturated 0.4 M CsHCO<sub>3</sub> electrolyte after the potential step from -0.1 V to -0.2 V for 200 s.

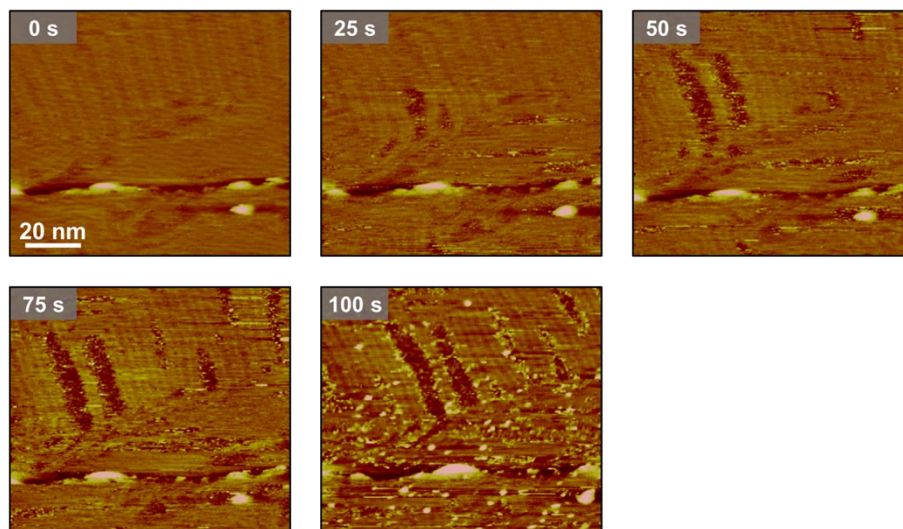

**Fig. S9.** EC-STM images of Au(111) in CO<sub>2</sub>-saturated 0.3 M CsHCO<sub>3</sub> electrolyte after the potential step from -0.1 V to -0.2 V.

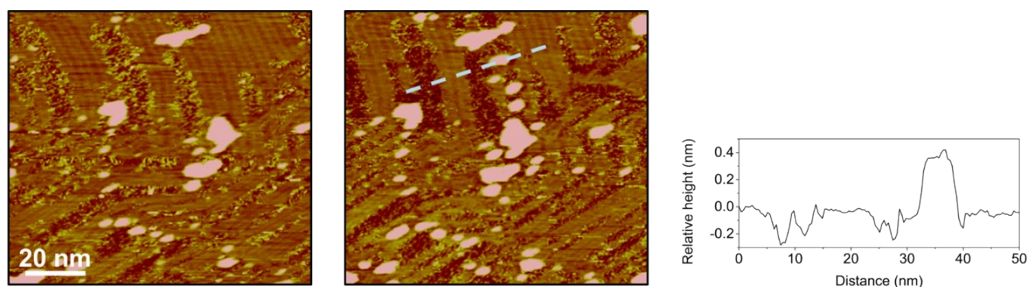

**Fig. S10.** In situ EC-STM images of Au(111) in CO<sub>2</sub>-saturated 0.3 M CsHCO<sub>3</sub> electrolyte at -0.2 V showing the release and clustering of surface Au atoms. Cross-section corresponding to the dashed line.

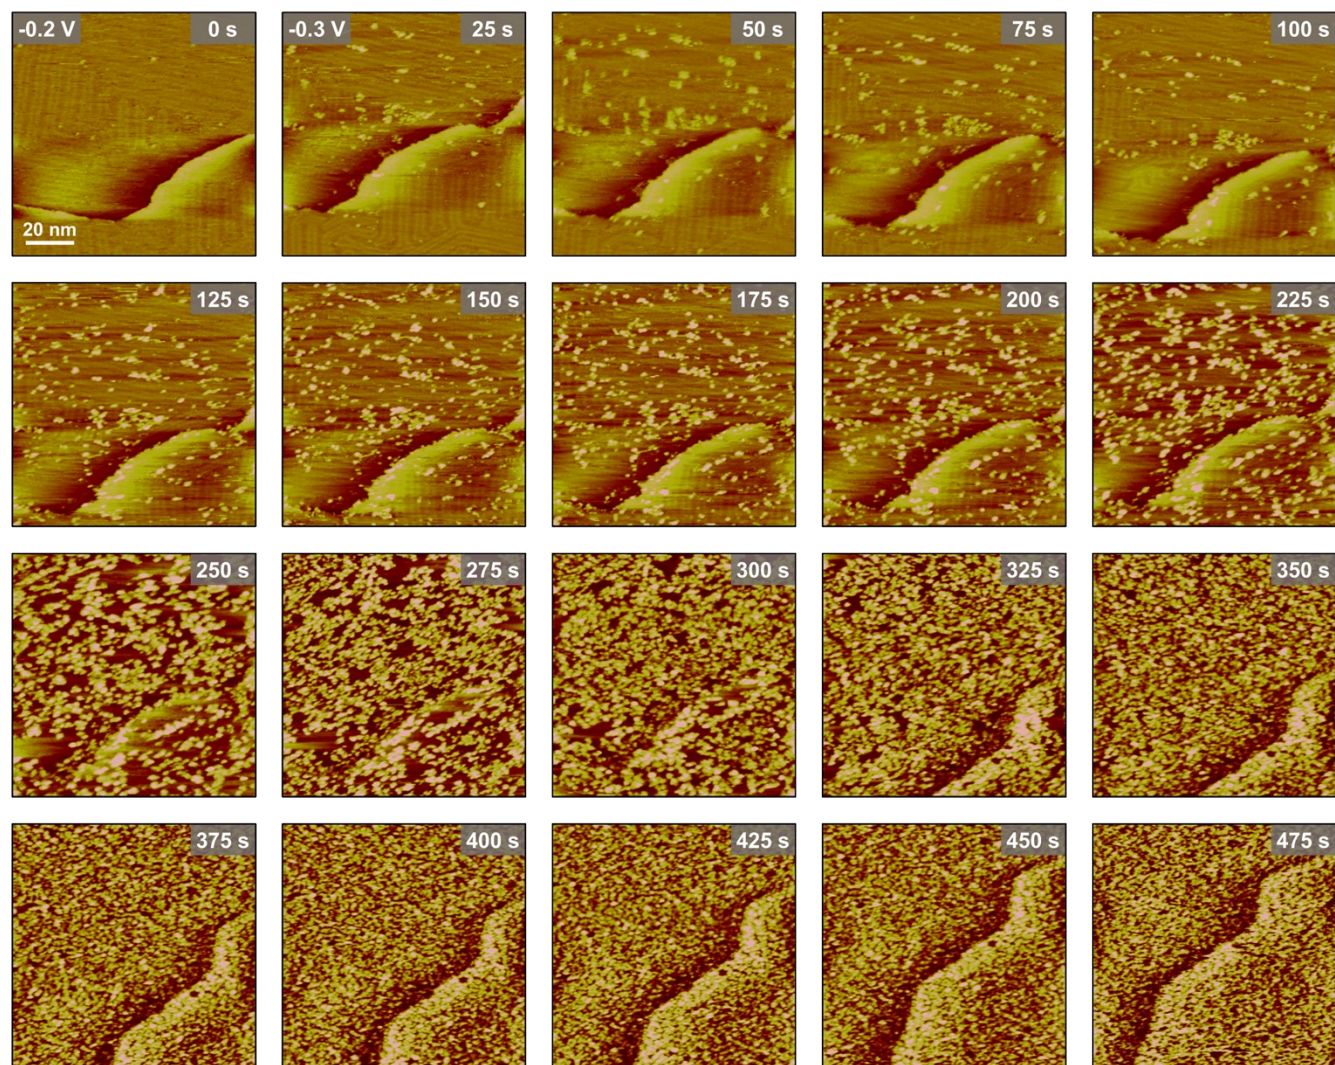

**Fig. S11.** EC-STM images of Au(111) in CO<sub>2</sub>-saturated 0.2 M CsHCO<sub>3</sub> electrolyte after the potential step from -0.2 V to -0.3 V.

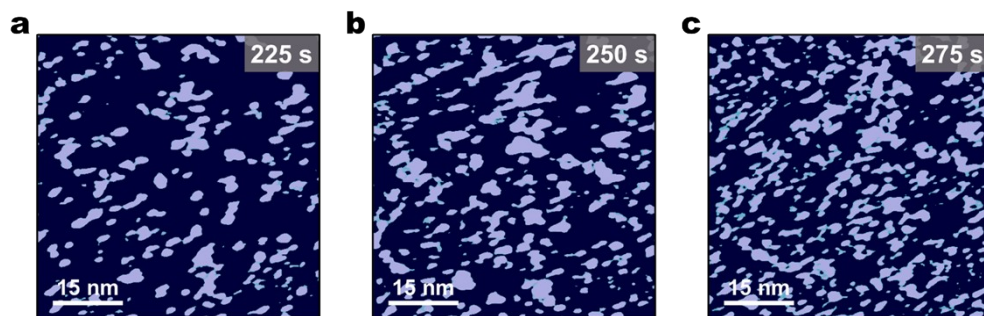

**Fig. S12.** Particle analysis of Au(111) surface roughened in CO<sub>2</sub>-saturated 0.2 M CsHCO<sub>3</sub> electrolyte. EC-STM images of the roughened Au(111) surface are shown in Fig. S11. (a-c) Processed EC-STM images by particle analysis (Digital Instruments, Inc.) showing the unroughened Au(111) region (dark blue) and surface Au clusters (pale blue).



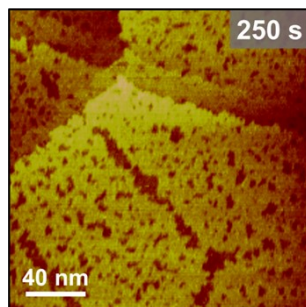

**Fig. S13.** EC-STM image of Au(111) in Ar-purged 1 M KHCO<sub>3</sub> electrolyte at 250 s after the potential step from 0 V to -0.1 V.

Here, the influence of CO<sub>2</sub> on the structure evolution of Au(111) under cathodic polarization is investigated. It has been reported that the surface morphology of Au(111) in CO<sub>2</sub>-saturated and Ar-purged 0.1 M CsHCO<sub>3</sub> electrolytes is nearly identical at -0.4 V,<sup>1</sup> indicating that the role of CO<sub>2</sub> in Au(111) surface restructuring is neglectable in dilute electrolytes. For concentrated electrolytes, as shown in Fig. S13, the morphology of Au(111) in Ar-purged 1 M KHCO<sub>3</sub> at -0.1 V is similar to that obtained in CO<sub>2</sub>-saturated 1 M KHCO<sub>3</sub> at the same potential (Fig. S3). These results suggest that the contribution of CO<sub>2</sub> to the cathodic structure evolution of Au(111) is minor, which can be attributed to the weak interaction between CO<sub>2</sub> and Au.

Moreover, the influence of HCO<sub>3</sub><sup>-</sup> was evaluated under different electrolyte concentrations. In 0.1 M electrolytes, Au(111) exhibits similar surface morphologies in Ar-purged CsHCO<sub>3</sub> and CsClO<sub>4</sub> at -0.4 V, indicating that HCO<sub>3</sub><sup>-</sup> has a negligible effect on Au(111) surface restructuring.<sup>1</sup> In 1 M electrolytes at -0.1 V, the Au(111) surface remains atomically flat in LiHCO<sub>3</sub> (Fig. S4), whereas severe corrosion is observed in CsHCO<sub>3</sub> (Fig. 1), demonstrating that surface restructuring in concentrated electrolytes is primarily driven by AM<sup>+</sup> rather than HCO<sub>3</sub><sup>-</sup>. Moreover, it has been reported that HCO<sub>3</sub><sup>-</sup> interacts weakly with Au under cathodic potentials, with a physisorption free energy of 22 kJ mol<sup>-1</sup> at 0 V,<sup>2</sup> which further supports the conclusion that HCO<sub>3</sub><sup>-</sup> plays a minimal role in driving surface structure evolution.

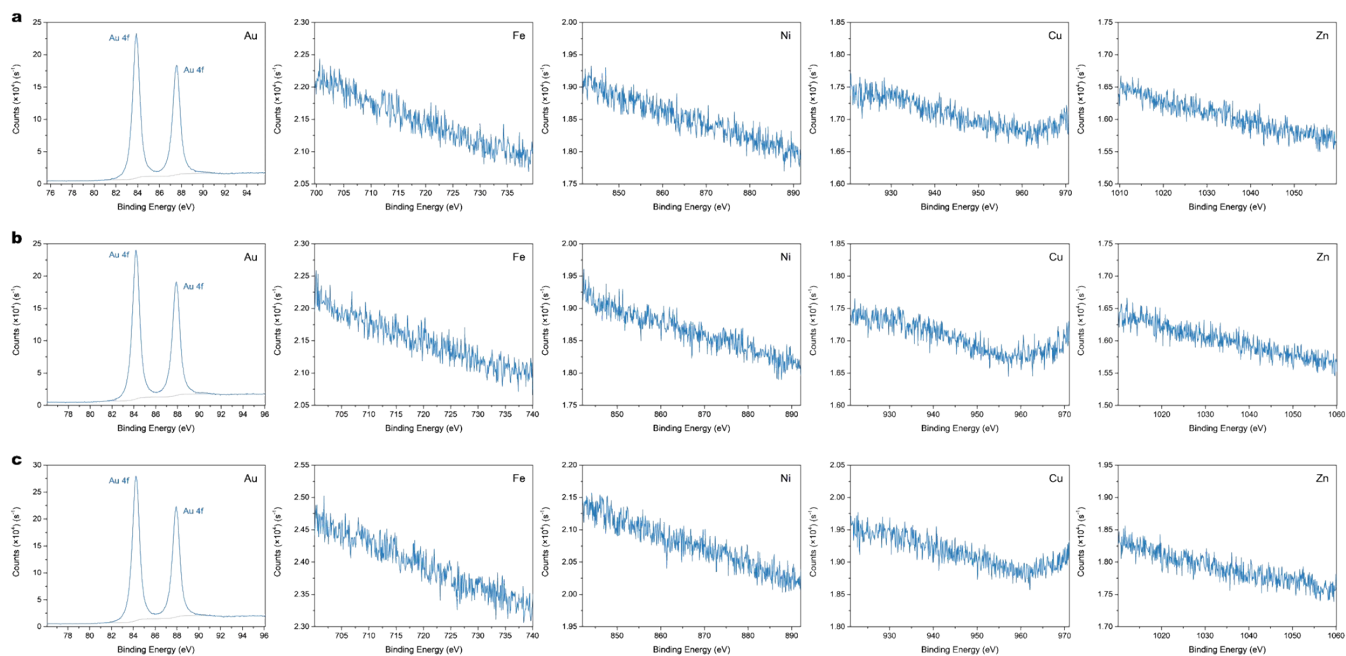

**Fig. S14.** XPS of Au(111) surfaces after roughened in CO<sub>2</sub>-saturated (a) 1 M CsHCO<sub>3</sub> electrolyte at -0.1 V, (b) 0.5 M CsHCO<sub>3</sub> electrolyte at -0.2 V, and (c) 0.2 M CsHCO<sub>3</sub> electrolyte at -0.3 V for 15 min.

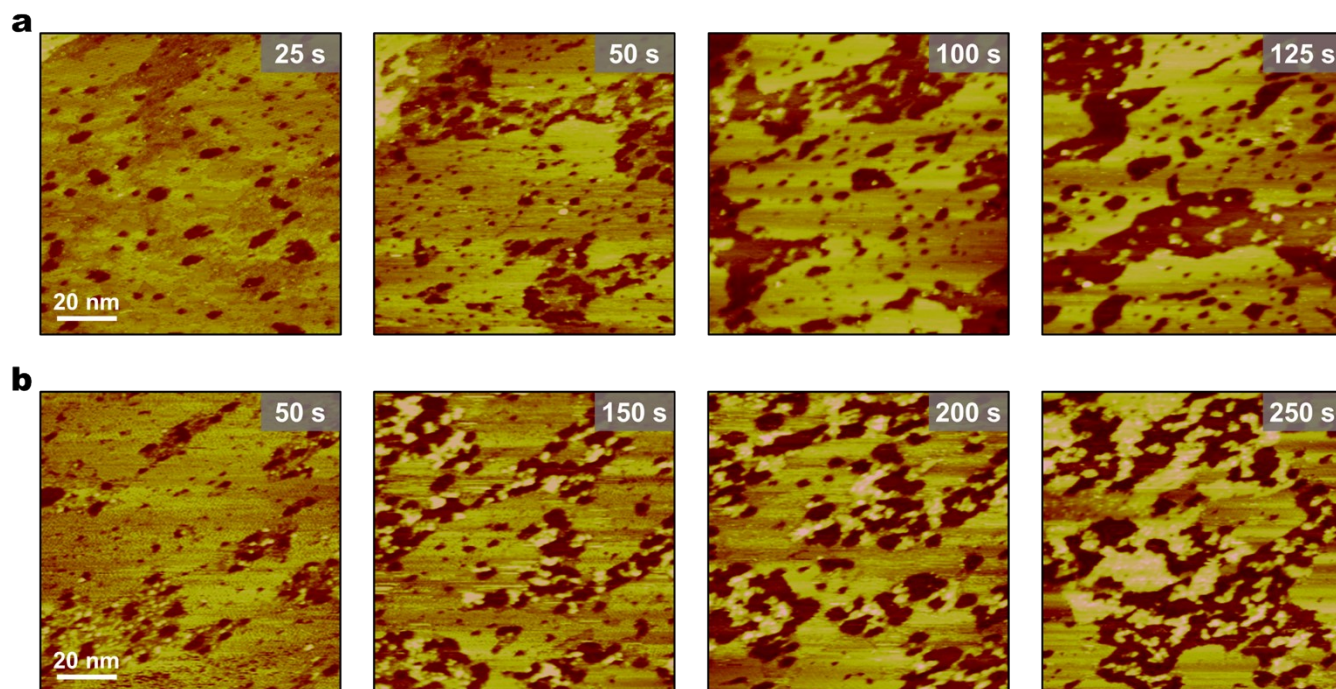

**Fig. S15.** EC-STM images of Au(111) in CO<sub>2</sub>-saturated 0.1 M CsHCO<sub>3</sub> electrolyte containing 10 mM PA after the potential step from -0.1 V to -0.2 V.

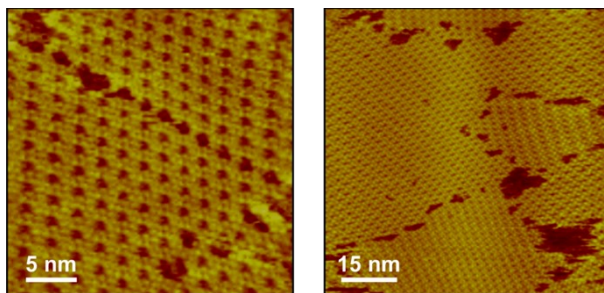

**Fig. S16.** EC-STM images of Au(111) in CO<sub>2</sub>-saturated 0.1 M NaHCO<sub>3</sub> electrolyte containing 10 mM PA after the potential step from -0.1 V to -0.2 V.

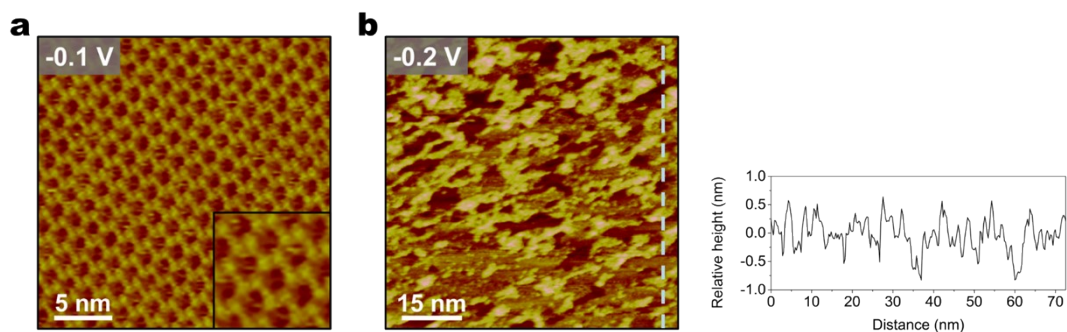

**Fig. S17.** EC-STM images of Au(111) in CO<sub>2</sub>-saturated 0.1 M CsHCO<sub>3</sub> electrolyte containing 10 mM TMA at (a) -0.1 V and (b) -0.2 V. Cross-section corresponding to the dashed line.

In CO<sub>2</sub>-saturated 0.1 M CsHCO<sub>3</sub> electrolyte containing 10 mM TMA, a well-ordered self-assembled monolayer of TMA is formed on the Au(111) surface at -0.1 V. Each bright spot represents a TMA molecule.



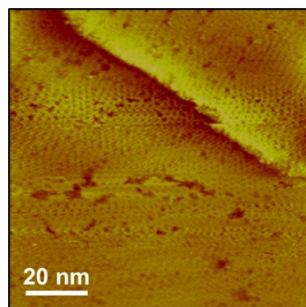

**Fig. S18.** EC-STM image of Au(111) in CO<sub>2</sub>-saturated 0.1 M CsHCO<sub>3</sub> electrolyte containing 10 mM OPA at -0.2 V.

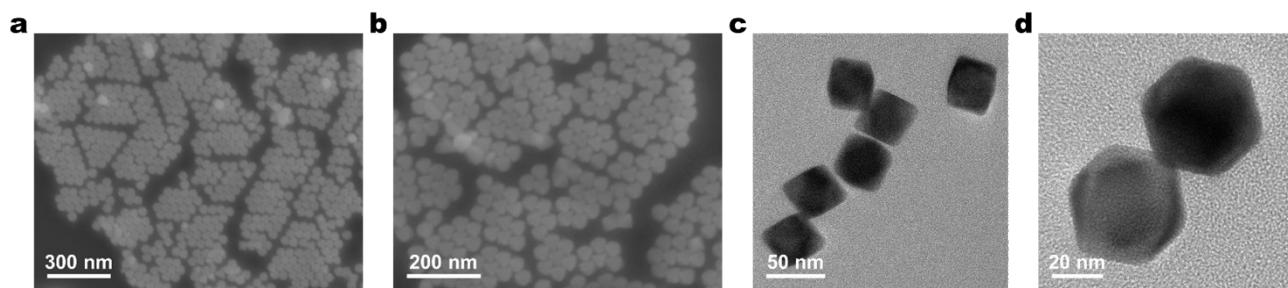

**Fig. S19.** Au NPs characterized by (a and b) transmission electron microscopy (TEM) and (c and d) scanning electron microscopy (SEM).

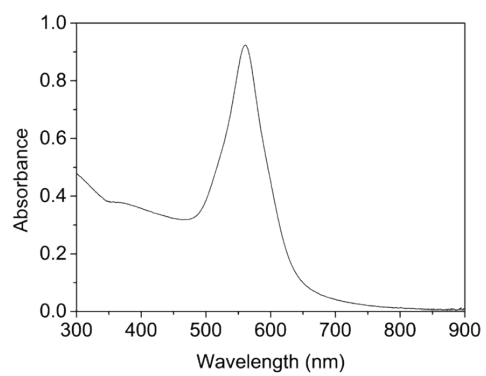

**Fig. S20.** Au NPs characterized by UV-Vis spectroscopy.

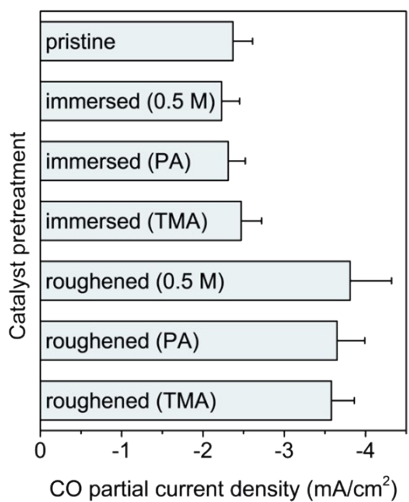

**Fig. S21.** CO partial current density of pristine and pretreated Au NPs electrodes measured at  $-0.8$  V in  $\text{CO}_2$ -saturated  $0.1$  M  $\text{CsHCO}_3$  electrolyte. The pretreated Au NPs electrodes are immersed or roughened (at  $-0.8$  V) in  $0.5$  M  $\text{CsHCO}_3$  electrolyte,  $0.1$  M  $\text{CsHCO}_3$  electrolyte (containing  $10$  mM PA), and  $0.1$  M  $\text{CsHCO}_3$  electrolyte (containing  $10$  mM TMA).

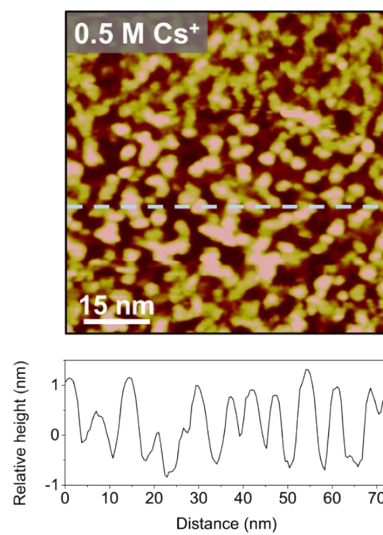

**Fig. S22.** EC-STM image of Au(111) in CO<sub>2</sub>-saturated 0.5 M CsHCO<sub>3</sub> electrolytes at -0.8 V.



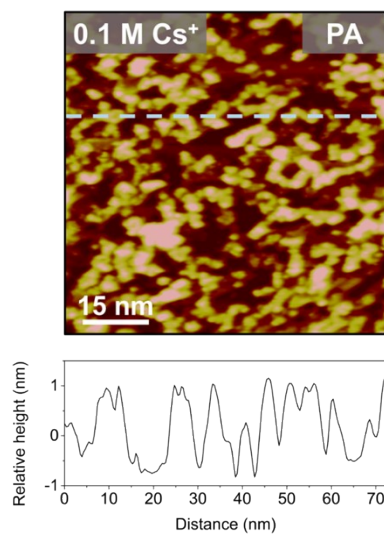

**Fig. S23.** EC-STM image of Au(111) in CO<sub>2</sub>-saturated 0.1 M CsHCO<sub>3</sub> electrolytes containing 10 mM PA at -0.8 V.

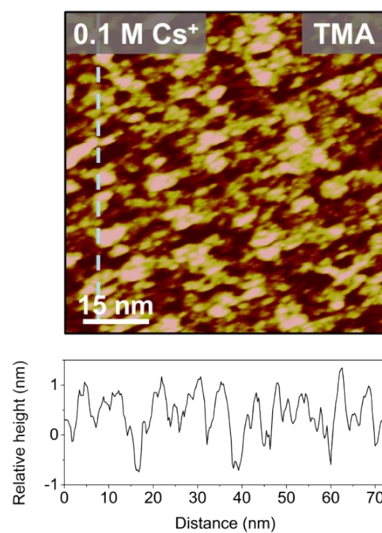

**Fig. S24.** EC-STM image of Au(111) in  $\text{CO}_2$ -saturated  $0.1 \text{ M CsHCO}_3$  electrolytes containing  $10 \text{ mM TMA}$  at  $-0.8 \text{ V}$ .

## References

- 1 Y.-Q. Wang, J. Fu, Y. Feng, K. Zhao, L. Wang, J.-Y. Cai, X. Wang, T. Chen, F. Yang, J.-S. Hu, B. Xu, D. Wang and L.-J. Wan, *J. Am. Chem. Soc.*, 2024, **146**, 27713–27724.
- 2 J. M. Yoo, J. Ingenmey, M. Salanne and M. R. Lukatskaya, *J. Am. Chem. Soc.*, 2024, **146**, 31768–31777.
